# Supplementary material
Source: publisher figshare collection journal article supplement (https://tandf.figshare.com/ndownloader/files/17544182)

**Supplementary figure**


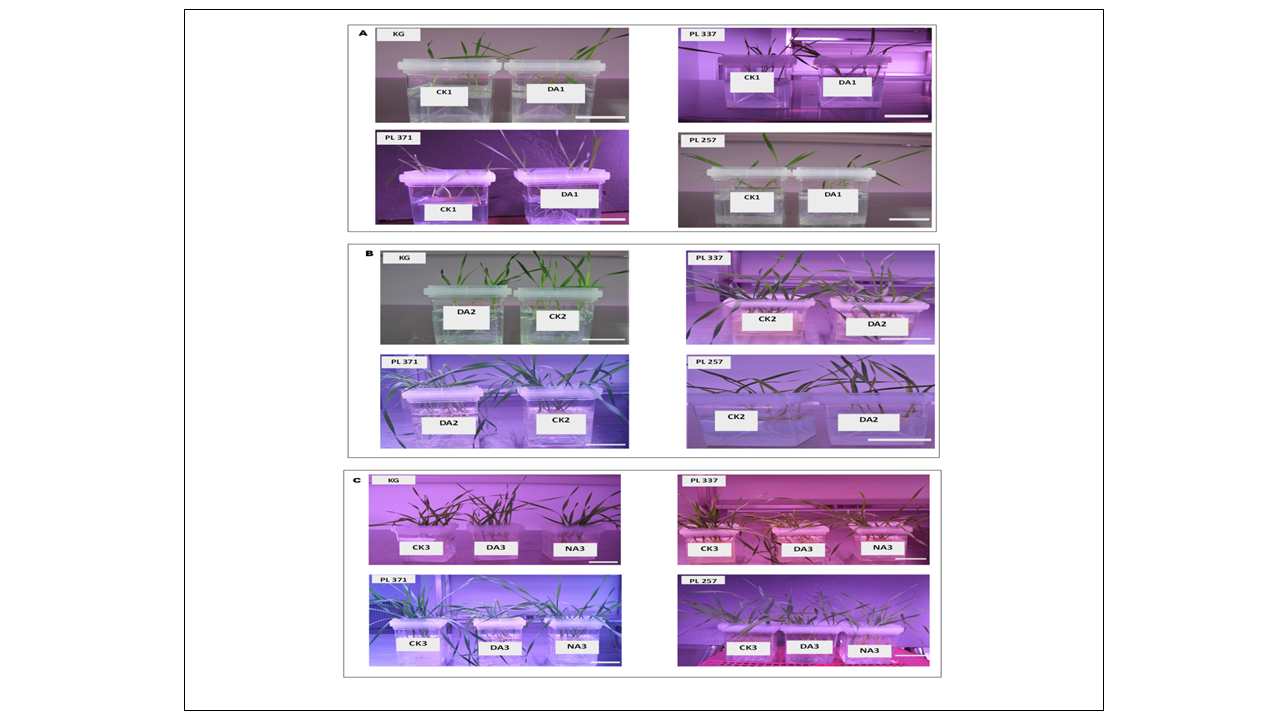


Fig. S1.

Supplement: Supplementary file 1 [file 17544182]
